# Supplementary material for: Conservation of replication timing reveals global and local regulation of replication origin activity
Source: HighWire-hosted journal article supplement (doi:10.1101/gr.139477.112), 2012-07-05
Supplement: Fig_S15.pdf [file Fig_S15.pdf]

# Müller et al. Figure S15

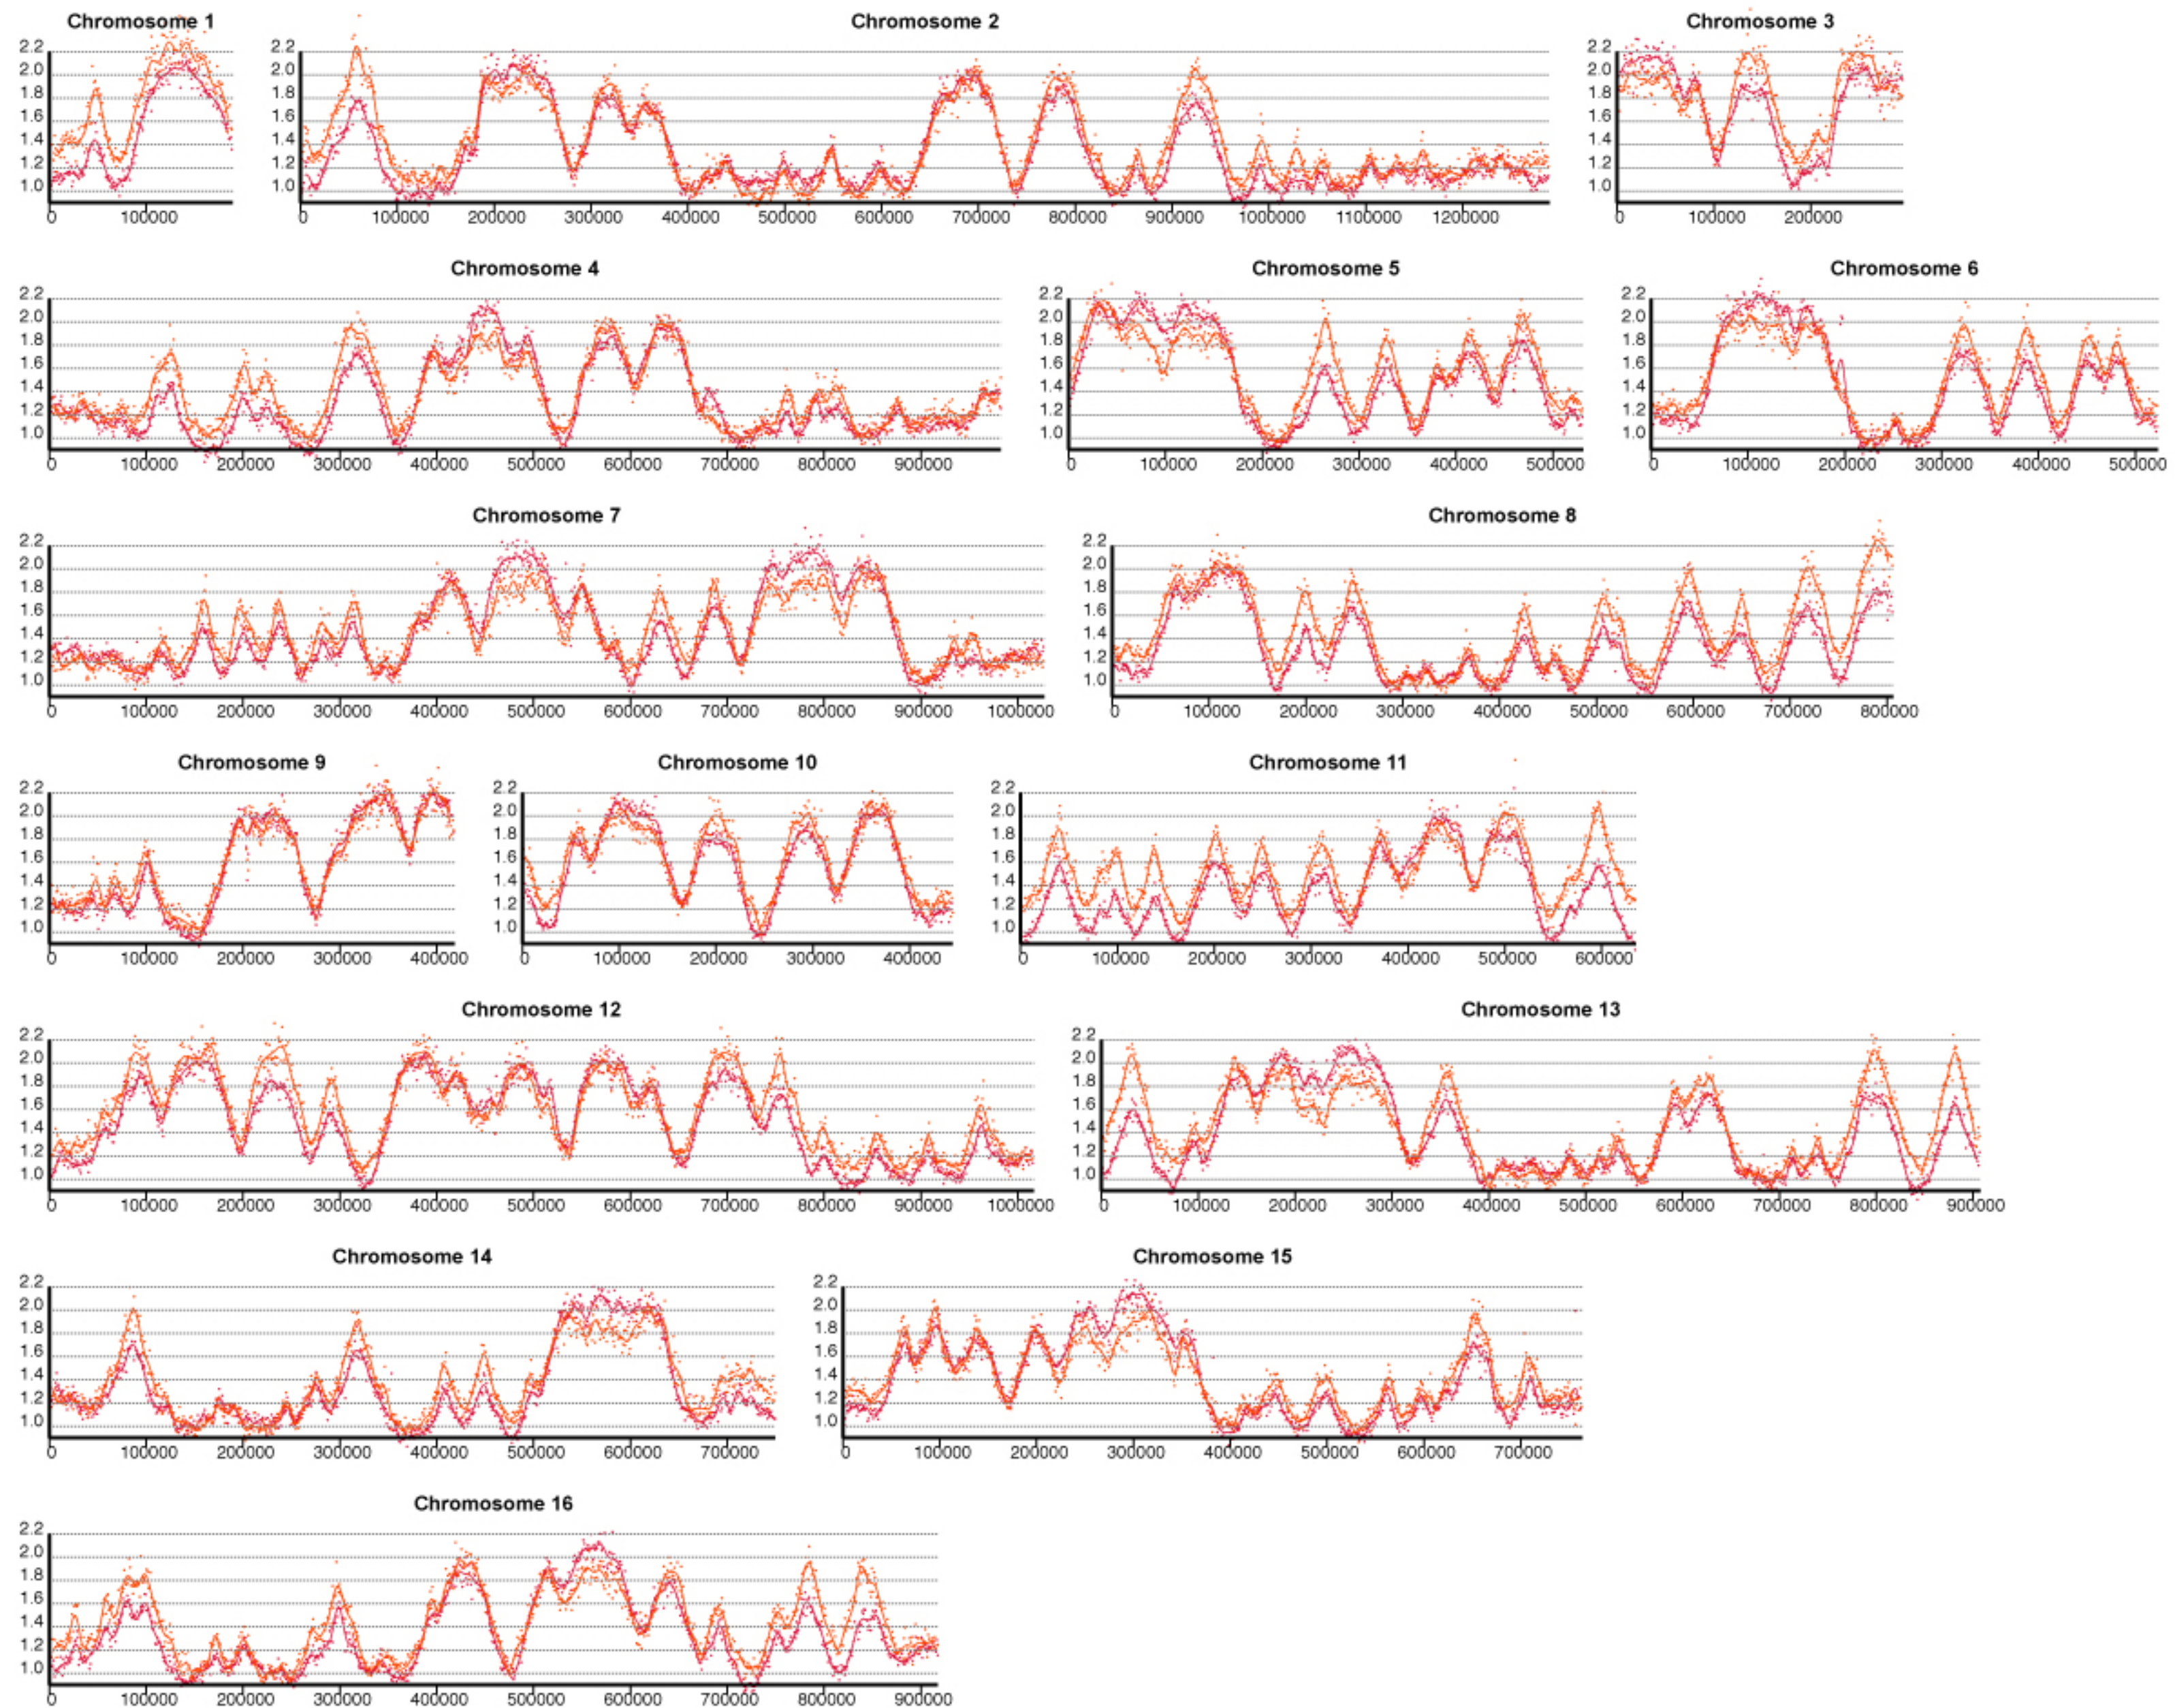

Normalisation factor used: 0.90, Data plotted from: OS24/OS24.wig, Smoothing factor: 0.985, No smoothing across windows > 5000 that lack data points.

Normalisation factor used: 0.65, Data plotted from: CC189/CC189bay.wig, Smoothing factor: 0.985, No smoothing across windows > 5000 that lack data points.
