# Supplementary material for: Conservation of replication timing reveals global and local regulation of replication origin activity
Source: HighWire-hosted journal article supplement (doi:10.1101/gr.139477.112), 2012-07-05
Supplement: SuppLegends.docx [file SuppLegends.docx]

**Supplementary Material**

**Supplementary figures:**

Figure S1. Flow cytometry profiles of FACS sorted cell fractions.

Figure S2. Distribution of relative DNA copy number.

Figure S3. Genome-wide replication profile for *S. cerevisiae*.

Figure S4. Genome-wide replication profile for *S. paradoxus*.

Figure S5. Genome-wide replication profile for *S. arboricolus*.

Figure S6. Genome-wide replication profile for *S. bayanus*.

Figure S7. Projection of genome-wide data from all four *sensu stricto* species onto *S. cerevisiae* chromosomal coordinates.

Figure S8. Correlations between deep sequencing data and published microarray studies.

Figure S9. Zones of early and late activating origins are conserved between *sensu stricto Saccharomyces* species.

Figure S10. The results of *S. paradoxus* chromosome 6 ARS assays.

Figure S11: Translocations can result in altered replication origin activity.

Figure S12: Genome-wide replication profiles from the *S. cerevisiae* chromosome set from the hybrid genome.

Figure S13: Direct comparison between genome-wide replication profiles of the *S. cerevisiae* chromosome set from the hybrid genome and the ‘pure’ *S. cerevisiae* diploid strain.

Figure S14: Genome-wide replication profiles from the *S. bayanus* chromosome set from the hybrid genome.

Figure S15: Direct comparison between genome-wide replication profiles of the *S. bayanus* chromosome set from the hybrid genome and the ‘pure’ *S. bayanus* diploid strain.

Figure S16: Direct comparison between genome-wide replication profiles of the *S. bayanus* chromosome set from the hybrid genome projected onto *S. cerevisiae* chromosomal coordinates and the *S. cerevisiae* chromosome set from the hybrid genome.

Figure S17. Flow cytometry profiles of *S. cerevisiae* / *S. bayanus* mutant strains.

Figure S18. Duplication of the *GAL2* gene in *S. bayanus* has not resulted in duplication of the replication origin *ARS1212*.

Figure S19. Effect of telomere proximity on replication timing in an *S. cerevisiae* / *S. bayanus* hybrid.

Figure S20. Telomere length measurement by southern blot.

**Supplementary tables:**

Table S1. Sequences analyzed for origin activity using a recombination-based ARS assay.

Table S2. *S. paradoxus* and *S. bayanus* sequences analyzed for origin activity using ARS assays.

Table S3. Mapping statistics of deep sequencing runs.

Table S4. Origin sites showing different peak heights in the replication profiles between the *sensu stricto* species.

Table S5. Strain table.

**Supplementary Figure Legends**

**Supplementary Figure S1. Flow Cytometry profiles of FACS sorted cell fractions.** Cells in S phase and G2 phase were sorted from an asynchronous culture (profile in solid grey). Aliquots of sorted cells were analyzed by flow cytometry to ensure sufficient enrichment of cells in S phase (red line) or G2 phase (blue line) for (A) *S. cerevisiae*, (B) *S. paradoxus*, (C) *S. arboricolus*, (D) *S. bayanus*, (E) *S. cerevisiae* / *S. bayanus* hybrid CC189.

**Supplementary Figure S2. Distribution of relative DNA copy number.** Relative copy number in S and G2 phase were measured by deep sequencing and the ratio calculated for each 1 kb window. The absolute ratio reflects the number of reads returned from each sequencing run. Therefore each experiment was normalized to ensure that minimum ratio was ~1. In each case we found, as expected from the underlying biology, that the maximum ratio was then ~2.

**Supplementary Figures S3 - S7. Genome wide replication profile for four *Saccharomyces sensu stricto* species.** Fluorescent-activated cell sorting (FACS) was used to obtain cells in S phase and G2 phase from an asynchronous culture. Relative copy number differences between the fractions were measured by deep sequencing (AB SOLiD). These differences were normalized to control for variations in number of returned reads from the sequencing (see methods). Shown are the raw data points for each 1 kb window as well as corresponding profiles when smoothing is applied (line). Supplementary Figure S3: *S. cerevisiae*; Supplementary Figure S4: *S. paradoxus*; Supplementary Figure S5: *S. arboricolus*; Supplementary Figure S6: *S. bayanus*; Supplementary Figure S7: Projection of genome-wide data from all four *sensu stricto* species on to *S. cerevisiae* chromosomal coordinates.

**Supplementary Figure S8. Correlations between deep sequencing data and published microarray studies.** Our deep sequencing measurement of relative copy number was compared with the mean replication time (Trep) obtained from microarray analysis performed by (A) Raghuraman and (B) Yabuki. Corresponding values from relevant data sets are plotted against each other in a window size of 500 bp. The correlation coefficients are 0.73 for Raghuraman’s data and 0.87 for Yabuki’s data compared to our data.

**Supplementary Figure S9. Zones of early and late activating origins are conserved between *sensu stricto Saccharomyces* species.** The replication timing profile of chromosome 4 exhibits clearly distinguishable zones of early/ Clb5-independent regions and late/Clb5*-*dependent regions. These zones are conserved between *S. cerevisiae*, *S. paradoxus*, *S. arboricolus* and *S. bayanus*.

**Supplementary Figure S10. The results of *S. paradoxus* chromosome 6 ARS assays.** The location of *S. paradoxus* clones with (green) and without (grey) ARS activity is shown to scale. The location of sites syntenic to *S. cerevisiae* origins are shown by black bars. The results are positioned above the *S. paradoxus* chromosome 6 replication timing profile (reproduced from Fig. 2B).

**Supplementary Figure S11: Translocations can result in altered replication origin activity.** Projection of the *S. bayanus* replication timing data onto *S. cerevisiae* coordinates results in discontinuities of the profiles at ~300 kb on chromosome 2 and ~465 kb on chromosome 4 corresponding to the site of a reciprocal translocation. Projected *S. bayanus* data in red and *S. cerevisiae* data in blue. A vertical bar marks the position of the reciprocal translocation.

**Supplementary Figures S12 - S16. Genome wide replication profiles from an *S. cerevisiae* / *S. bayanus* hybrid.** Data was processed and presented as described in the legend to Figures S3-7. Supplementary Figure 12: *S. cerevisiae* portion of the hybrid genome; Supplementary Figure 13: Direct comparison between the *S. cerevisiae* portion of the hybrid genome and the ‘pure’ *S. cerevisiae* diploid strain; Supplementary Figure 14: *S. bayanus* portion of the hybrid genome; Supplementary Figure 15: Direct comparison between the *S. bayanus* portion of the hybrid genome and the ‘pure’ *S. bayanus* diploid strain; Supplementary Figure 16: Direct comparison between the *S. bayanus* portion of the hybrid genome projected on to *S. cerevisiae* chromosomal coordinates and the *S. cerevisiae* portion of the hybrid genome.

**Supplementary Figure S17. Flow cytometry profiles of *S. cerevisiae* / *S. bayanus* hybrid mutant strains.** The S*. cerevisiae* copy of essential replication machinery proteins (Mcm4, Mcm5, Orc2, Cdc7 and Cdc9) was deleted in the hybrid CC189. Resulting mutant strains are viable and exhibit a normal DNA content when analyzed by flow cytometry.

**Supplementary Figure S18. Duplication of the *GAL2* gene in *S. bayanus* has not resulted in duplication of the replication origin *ARS1212*. (**A) Sequence alignment of a region of *ARS1212* shows that the ACS (ORC-binding site) is conserved in the *sensu stricto* species shown. (B) *S. cerevisiae ARS1212* is located in the intergene between *EMP46* and *GAL2*. *S. arboricolus* is completely syntenic to *S. cerevisiae*, whereas in *S. bayanus* *GAL2* is duplicated. To check if *ARS1212* has also been duplicated, the two adjacent intergenes as well as the one syntenic to *ARS1212* were tested for ARS activity. (C) Plasmid-based ARS assays confirmed that in *S. bayanus* *ARS1212* is located in the same intergene as *S. cerevisiae* *ARS1212*. There was no origin activity detected in either of the adjacent intergenes.

**Supplementary Figure S19. Effect of telomere proximity on replication timing in an *S. cerevisiae* / *S. bayanus* hybrid.** Dot plot showing the difference in replication time (copy number) between a *S. cerevisiae* diploid (BY4743) and an *S. cerevisiae* / *S. bayanus* hybrid (CC189), plotted against distance from the closest telomere. Points are at 1-kb intervals for all genomic loci within 500 kb of a telomere; the black curve shows the average for all telomeres.

**Supplementary Figure S20. Telomere length measurement by southern blot.** Genomic DNA from diploid *S. bayanus* (OS24), *S. cerevisiae* (BY4743), the *S. cerevisiae* / *S. bayanus* hybrid (CC189) and a *S. cerevisiae* *tlc1::TLC1* heterozygote strain (as a control for shorter telomeres; CAY323) was extracted, digested with *XhoI* and subjected to a Y’ element specific probe. Note that *S. bayanus* does not have Y’ elements and therefore this blot is specific for the *S. cerevisiae* telomeres.

**Supplementary Table Legends**

**Supplementary Table S1. Sequences analyzed for origin activity using a recombination-based ARS assay.** The *S. cerevisiae* genome was screened systematically for the locations of unconfirmed origins. DNA clones, containing large (average 4kb) *S. cerevisiae* genomic DNA inserts were used in a recombination-based ARS assay. Clones that show ARS activity are listed in the sheet ‘positive large (~4kb) clones’. Clones that did not show origin activity are listed in the sheet ‘negative large (~ 4kb) clones’. The sheet ‘positive small insert (~500 bp)’ lists the locations of origins confirmed in smaller fragments. Each sheet gives the chromosome, start and end coordinates for the assayed fragment plus the OriDB site and origin name. Where clones were obtained from an existing genomic DNA library the name and source of the DNA clone is also given.

**Supplementary Table S2. *S. paradoxus* and *S. bayanus* sequences analyzed for origin activity using ARS assays.** (Sheet: S.paradoxus fragments) Summary of all fragments tested for recombinational-ARS activity in *S. paradoxus*. (Sheet: S.bayanus fragments) Summary of all fragments tested for ARS activity in *S. bayanus*. In both sheets, conditional formatting highlights in green those fragments that tested positive.

**Supplementary Table S3. Mapping statistics of deep sequencing runs.** Deep sequencing was performed using 1/16th of a slide on the AB SOLiD 4 Analyzer. For each sequenced sample, the number of returned raw reads and those mapping uniquely within the genome as well as the corresponding percentage of unique reads is listed. Due to the variation in the number of returned reads, the ratios between the S and G2 phase samples are normalized before plotting the data (see methods)

**Supplementary Table S4. Origin sites showing different peak heights in the replication profiles between the *sensu stricto* species.** Listed are those origins that show differences of at least 0.3 in relative copy number when comparing two *sensu stricto* species. For each origin the *S. cerevisiae* location (chromosome, start and end position), name, relative copy number in each species and six differences in relative copy number (for each pairwise comparison) are given. Conditional formatting is used to highlight: in red those origins that have a significantly higher copy number (difference >= 0.3) than at least one other species; in yellow or blue differences in relative copy number equal to or greater than 0.3 for each pairwise comparison.

**Supplementary Table S5. Strain table.** All strains that were used to obtain the data for this publication are listed. Strain names, species, background ,genotype, source and the experiment they were used for are listed.
