# Supplementary figures and images for: Conservation of replication timing reveals global and local regulation of replication origin activity
Source: HighWire-hosted journal article supplement (doi:10.1101/gr.139477.112), 2012-07-05

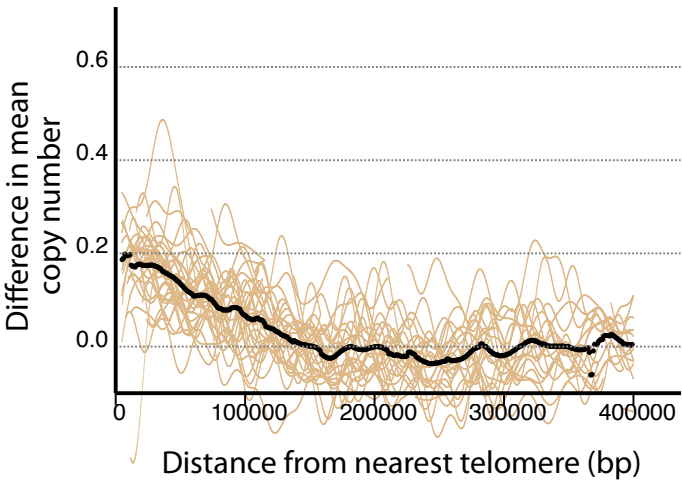

Supplement: Fig_S19.pdf [file Fig_S19.pdf]

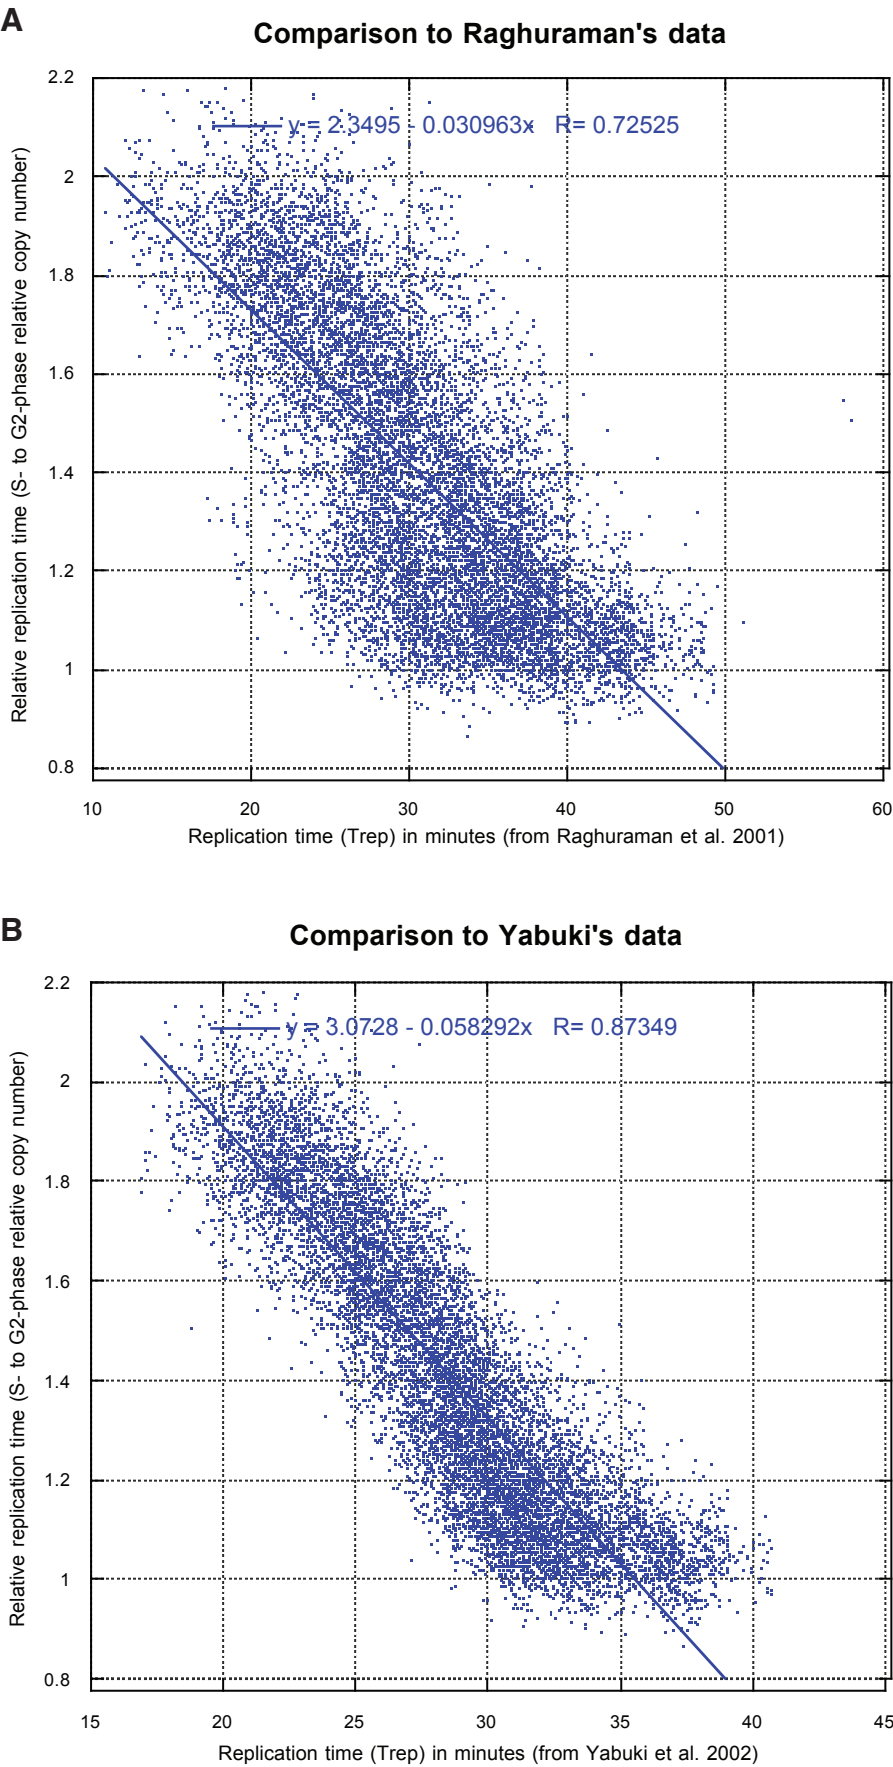

Supplement: Fig_S8.pdf [file Fig_S8.pdf]
